# Supplementary material for: The facile preparation of a carbon coated Bi2O3nanoparticle/nitrogen-doped reduced graphene oxide hybrid as a high-performance anode material for lithium-ion batteries
Source: Royal Society of Chemistry journal article supplement (doi:10.1039/c6ra24403c), 2016-01-01
Supplement: c6ra24403c1.pdf [file c6ra24403c1.pdf]

## Electronic Supplementary Information (ESI)

### **The facile preparation of carbon coated Bi<sub>2</sub>O<sub>3</sub> nanoparticles/nitrogen-doped reduced graphene oxide hybrid as a high-performance anode material for lithium- ion batteries**

**Wei Fang,<sup>a</sup> Naiqing Zhang,<sup>\*bc</sup> Lishuang Fan<sup>\*c</sup> and Kening Sun<sup>c</sup>**

<sup>a</sup>School of Chemistry and Chemical Engineering, Harbin Institute of Technology, Harbin 150090, PR China.

<sup>b</sup>State Key laboratory of Urban Water Resource and Environment, Harbin Institute of Technology, Harbin 150090, PR China. E-mail: znqmww@163.com.

<sup>c</sup>Academy of Fundamental and Interdisciplinary Sciences, Harbin Institute of Technology, Harbin, 150090, PR China. Email: fandysunning@126.com.

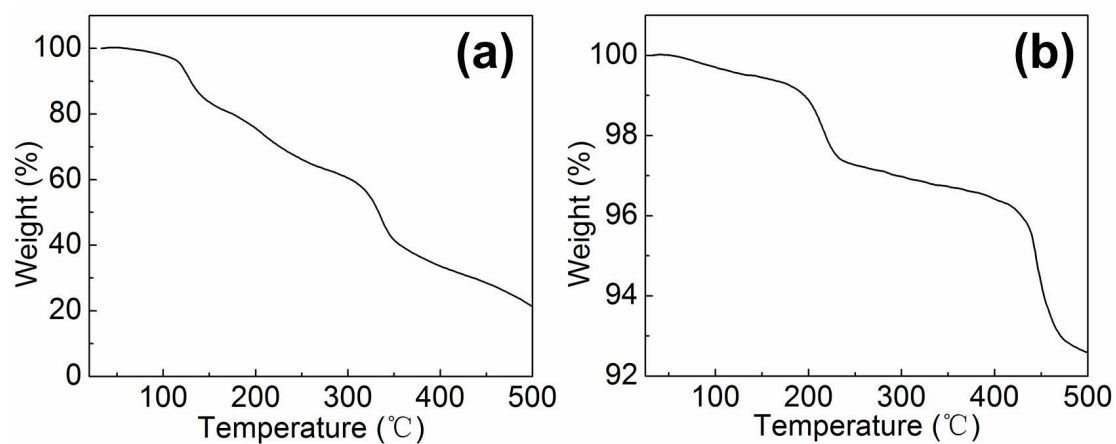

Fig. S1 TGA curves of (a) PTA and (b) GO.

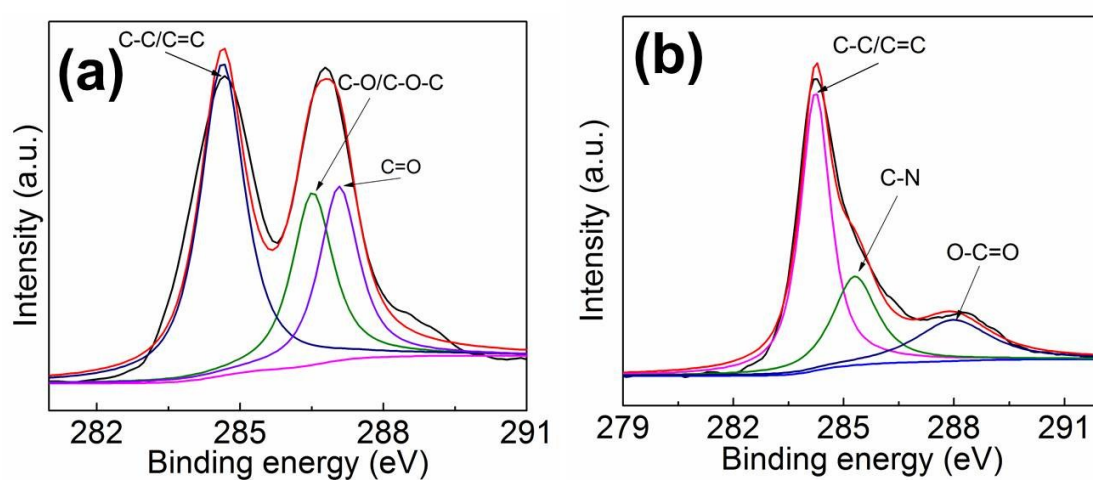

Fig. S2 High-resolution XPS spectra of C 1s of (a) GO and (b) Bi<sub>2</sub>O<sub>3</sub>@C@N-G.

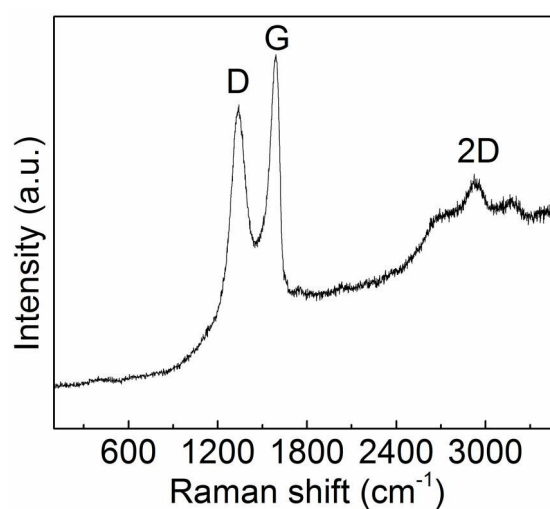

Fig. S3 Raman spectrum of Bi<sub>2</sub>O<sub>3</sub>@C@N-G.

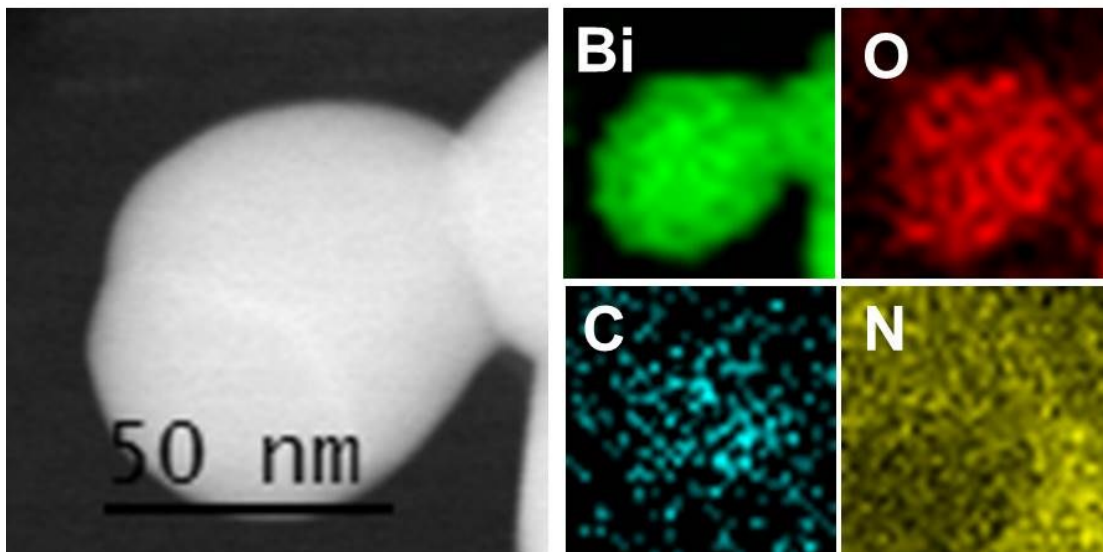

Fig. S4 HAADF-STEM image and elemental mapping results of  $\text{Bi}_2\text{O}_3@\text{C}@\text{N-G}$ .

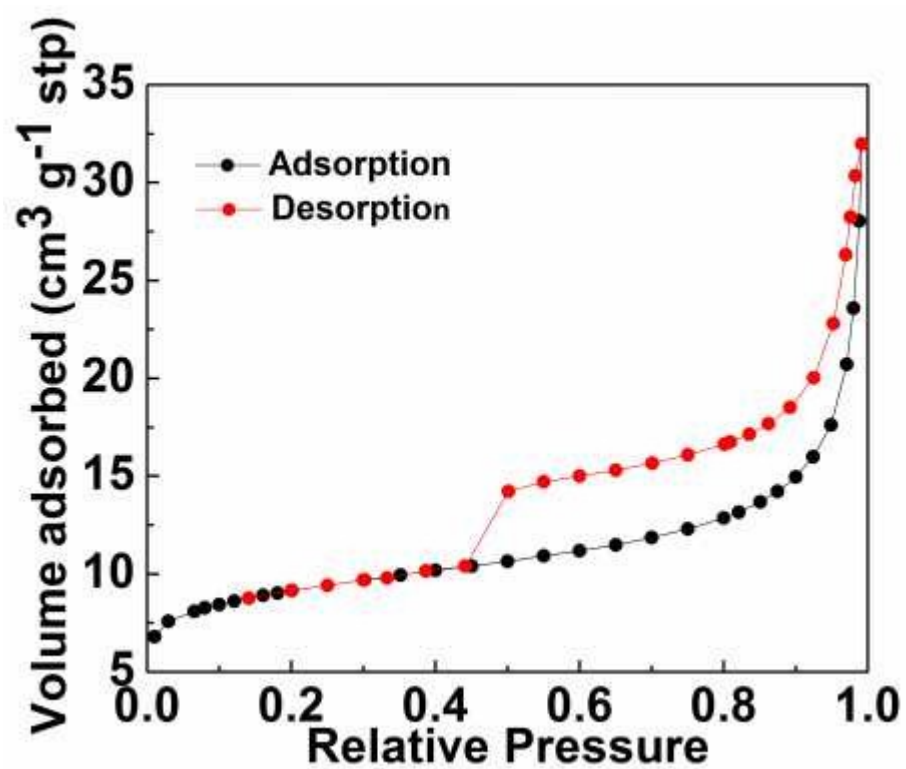

Fig. S5 Nitrogen adsorption and desorption isotherms of  $\text{Bi}_2\text{O}_3@\text{C}@\text{N-G}$ .

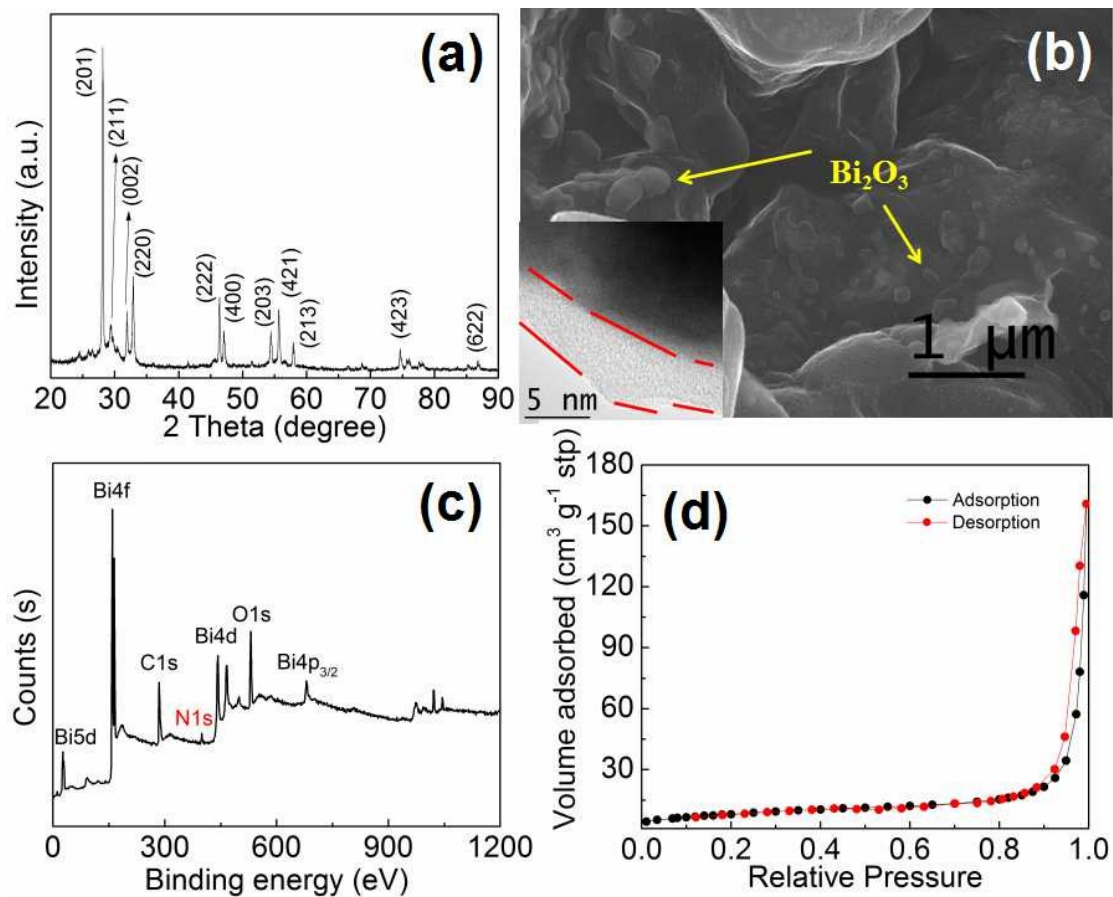

**Fig. S6** The characterization of  $\text{Bi}_2\text{O}_3@\text{C}@\text{N-RGO}$ . (a) XRD pattern. (b) SEM image (inset: HRTEM image). (c) Survey XPS spectrum. (d) Nitrogen adsorption and desorption isotherms. In XRD pattern, all the diffraction peaks could be indexed to tetragonal  $\text{Bi}_2\text{O}_3$  phase. HRTEM image shows that  $\text{Bi}_2\text{O}_3$  nanoparticle is uniformly and continuously coated by a thin carbon layer with a thickness of about 4 nm, as indicated by the red dashed line. The wide XPS spectrum of  $\text{Bi}_2\text{O}_3@\text{C}@\text{N-RGO}$  confirms the existence of Bi, O, C and N elements. Carbon content in  $\text{Bi}_2\text{O}_3@\text{C}@\text{N-RGO}$  is calculated to be around 13.8 wt% by soaking the hybrid in HCl solution and weighing the residue.

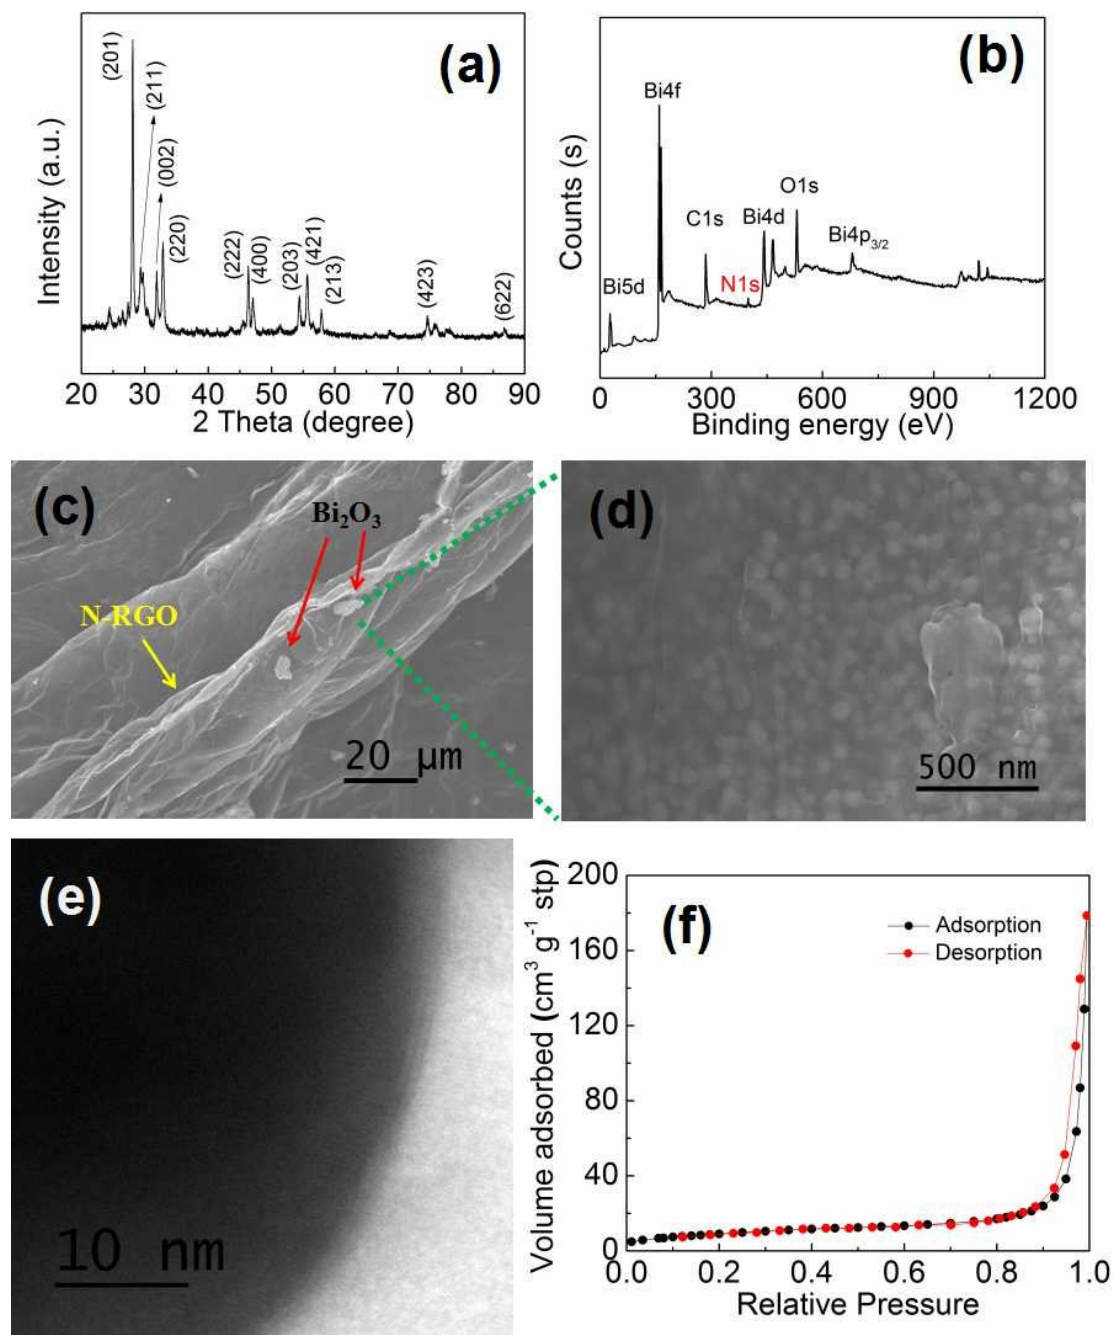

**Fig. S7** The characterization of Bi<sub>2</sub>O<sub>3</sub>@N-RGO. (a) XRD pattern. (b) Survey XPS spectrum. (c) SEM image. (d) Locally enlarged SEM. (e) HRTEM image. (f) Nitrogen adsorption and desorption isotherms. XRD pattern shows that all the diffraction peaks could be indexed to tetragonal Bi<sub>2</sub>O<sub>3</sub> phase. Wide XPS spectrum of Bi<sub>2</sub>O<sub>3</sub>@N-RGO confirms the existence of Bi, O, C and N elements. HRTEM image shows that Bi<sub>2</sub>O<sub>3</sub> nanoparticle isn't coated by a thin carbon layer. Carbon content in Bi<sub>2</sub>O<sub>3</sub>@N-RGO is calculated to be around 7.0 wt% by soaking the hybrid in HCl solution and weighing the residue.

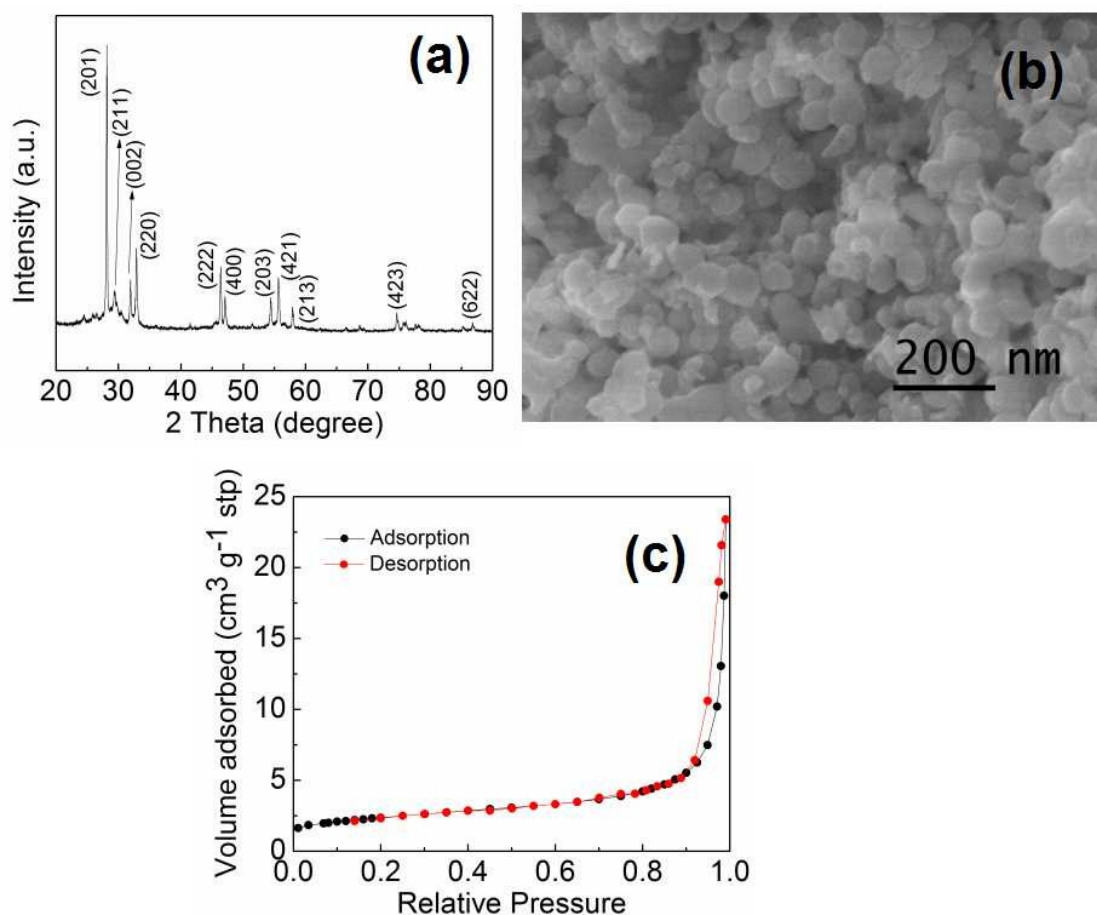

**Fig. S8** The characterization of Bi<sub>2</sub>O<sub>3</sub>@C. (a) XRD pattern. (b) SEM image. (c) Nitrogen adsorption and desorption isotherms. XRD pattern shows that all the diffraction peaks could be indexed to tetragonal Bi<sub>2</sub>O<sub>3</sub> phase.

**Table S1** Comparison of lithium storage between Bi<sub>2</sub>O<sub>3</sub>@C@N-G and previous Bi<sub>2</sub>O<sub>3</sub>-based material.

| Sample                                                         | Cycle ability                                                       | Rate capability                                    | Reference                                               |
|----------------------------------------------------------------|---------------------------------------------------------------------|----------------------------------------------------|---------------------------------------------------------|
| Bi <sub>2</sub> O <sub>3</sub> -Bi <sub>2</sub> S <sub>3</sub> | 433 mAh g <sup>-1</sup> after 100 cycles at 600 mA g <sup>-1</sup>  | 295 mAh g <sup>-1</sup> at 6 A g <sup>-1</sup>     | <i>Sci. Rep.</i> , 2014, <b>5</b> , 9307                |
| Bi <sub>2</sub> O <sub>3</sub> /Ni                             | 782 mAh g <sup>-1</sup> after 40 cycles at 100 mA g <sup>-1</sup>   | 668 mAh g <sup>-1</sup> at 800 mA g <sup>-1</sup>  | <i>J. Mater. Chem. A</i> , 2013, <b>1</b> , 12123-12127 |
| Bi <sub>2</sub> O <sub>3</sub> @C@N-G                          | 391 mAh g <sup>-1</sup> after 250 cycles at 3000 mA g <sup>-1</sup> | 326 mAh g <sup>-1</sup> at 4800 mA g <sup>-1</sup> | This work                                               |

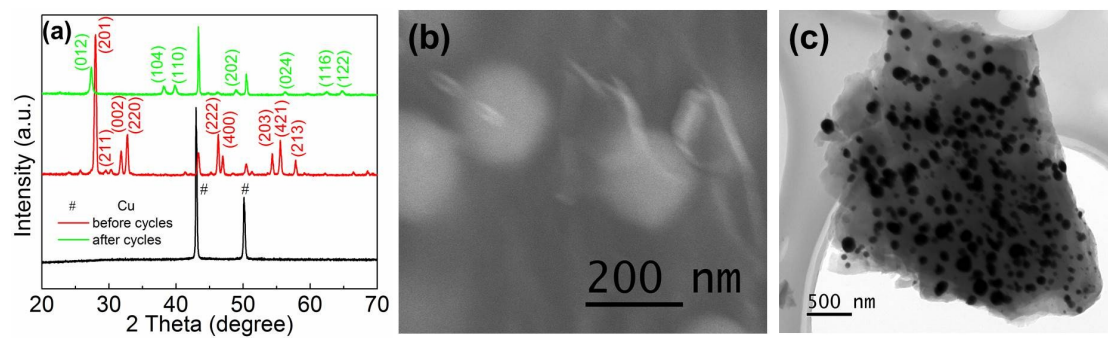

**Fig. S9** (a) XRD profiles of  $\text{Bi}_2\text{O}_3@\text{C}@\text{N-G}$  electrode after and before 250 cycles at  $3 \text{ A g}^{-1}$ . (b) SEM and (c) TEM images of  $\text{Bi}_2\text{O}_3@\text{C}@\text{N-G}$  after 250 cycles at  $3 \text{ A g}^{-1}$ .
